# Supplementary material for: Timing of renal replacement therapy initiation for acute kidney injury in critically ill patients: a systematic review of randomized clinical trials with meta-analysis and trial sequential analysis
Source: PubMed Central journal article supplement (PMC7789484; doi:10.1186/s13054-020-03451-y), 2021-01-06

**a. Funnel plot to evaluate potential publication bias for 28-day mortality**

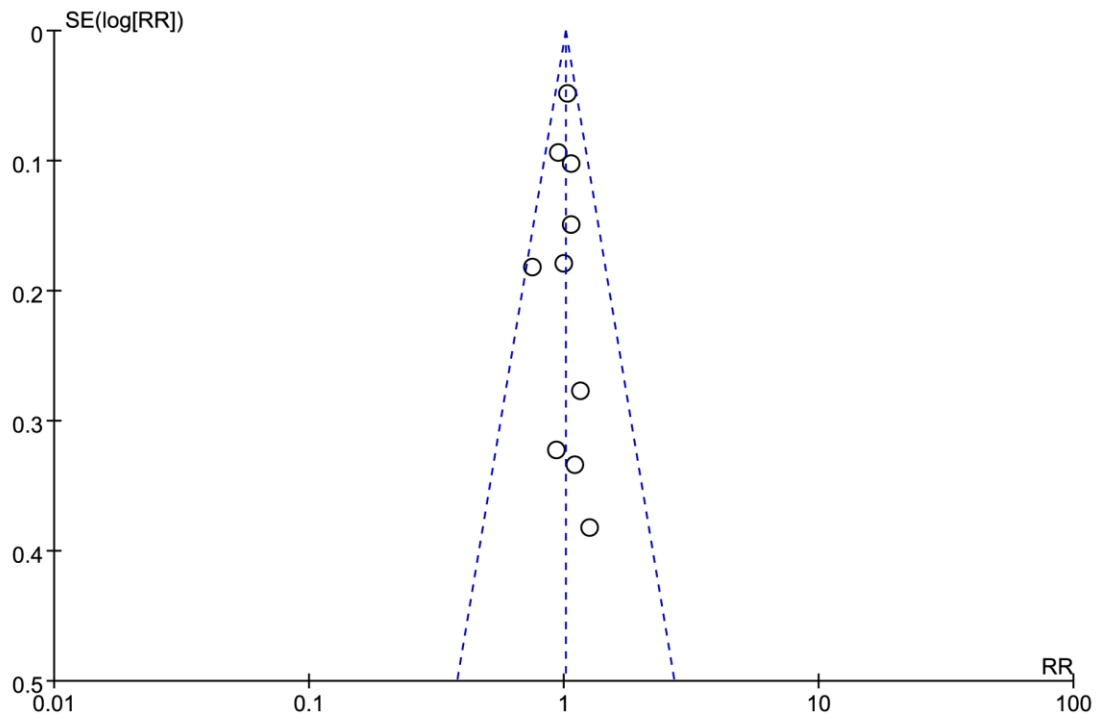

**b. Funnel plot to evaluate potential publication bias for 90-day mortality**

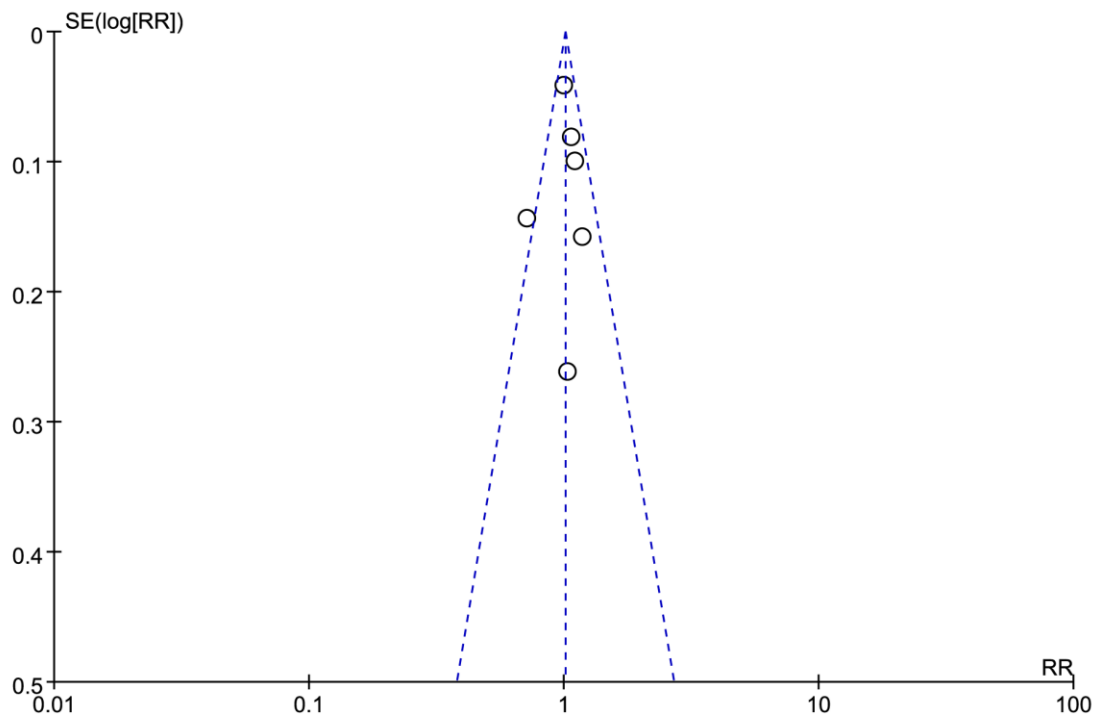

**c. Funnel plot to evaluate potential publication bias for ICU mortality**

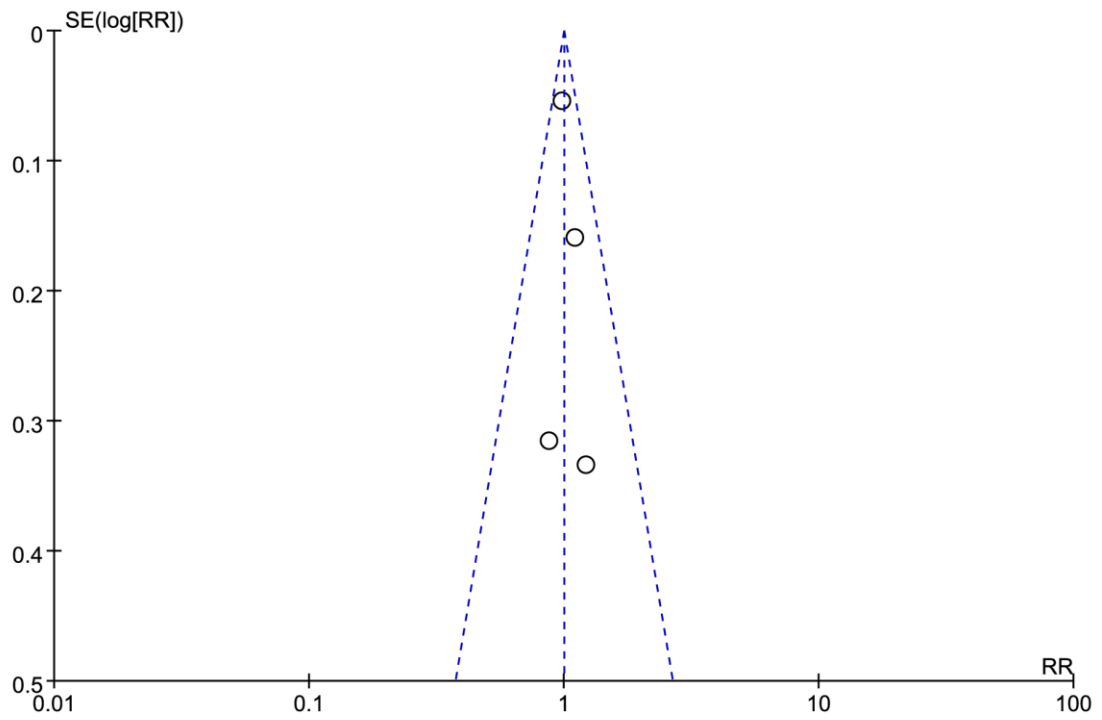

**d. Funnel plot to evaluate potential publication bias for hospital mortality**

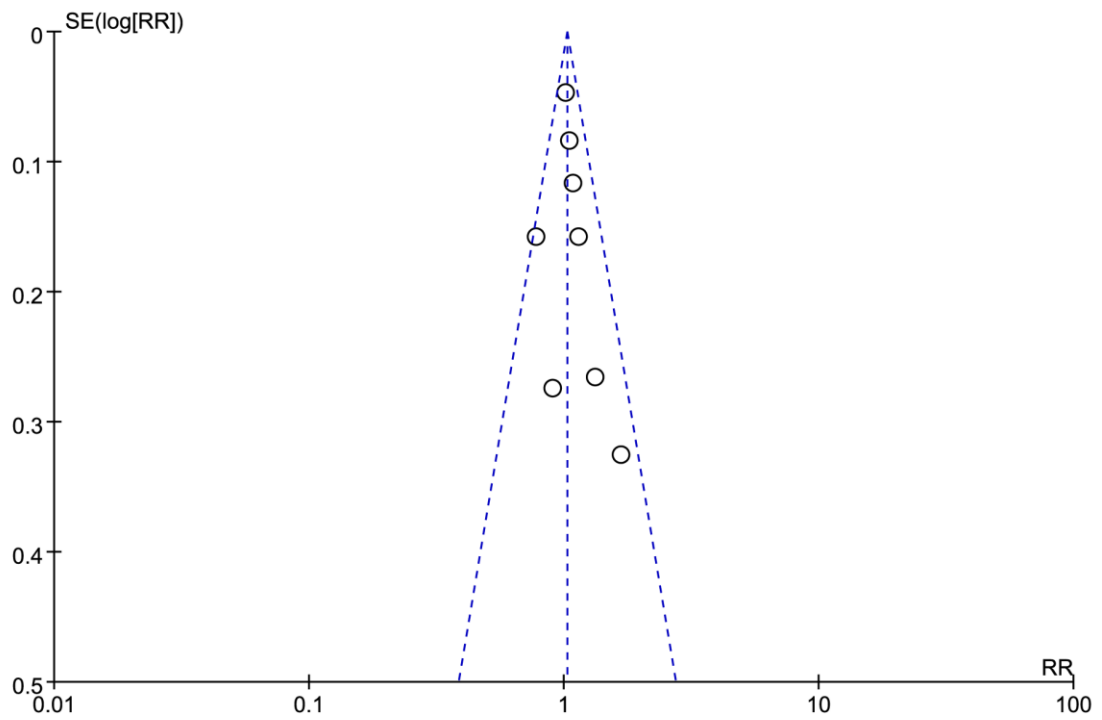

Supplement: 13054_2020_3451_MOESM4_ESM.pdf [file 13054_2020_3451_MOESM4_ESM.pdf]
