# Supplementary material for: Timing of renal replacement therapy initiation for acute kidney injury in critically ill patients: a systematic review of randomized clinical trials with meta-analysis and trial sequential analysis
Source: PubMed Central journal article supplement (PMC7789484; doi:10.1186/s13054-020-03451-y), 2021-01-06

### a. Number of patients who received RRT

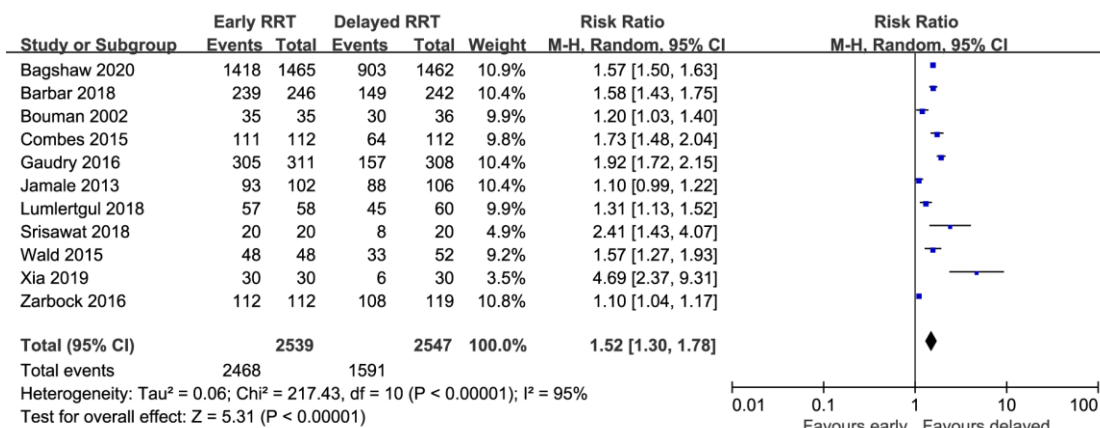

### b. RRT dependence among survivors at 28 days

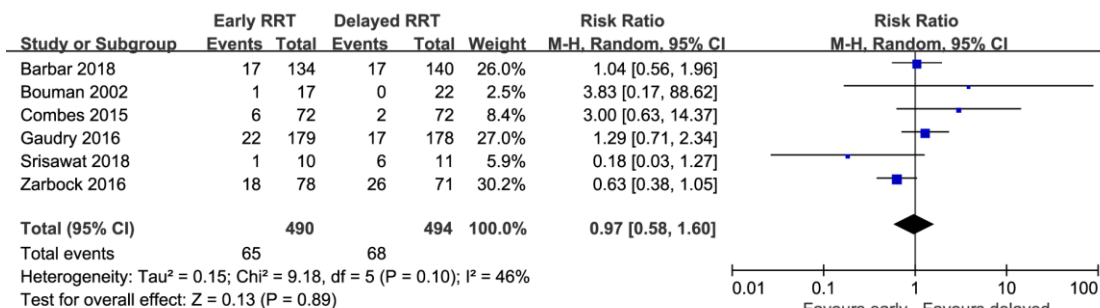

### c. RRT dependence among survivors at 90 days

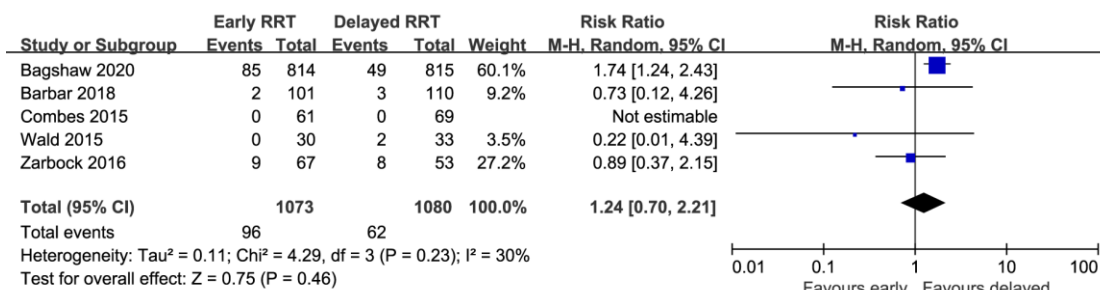

### d. The length of ICU stay

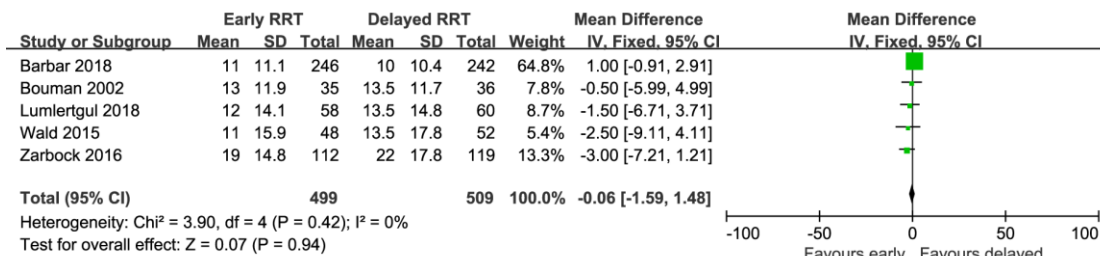

### e. The length of hospital stay

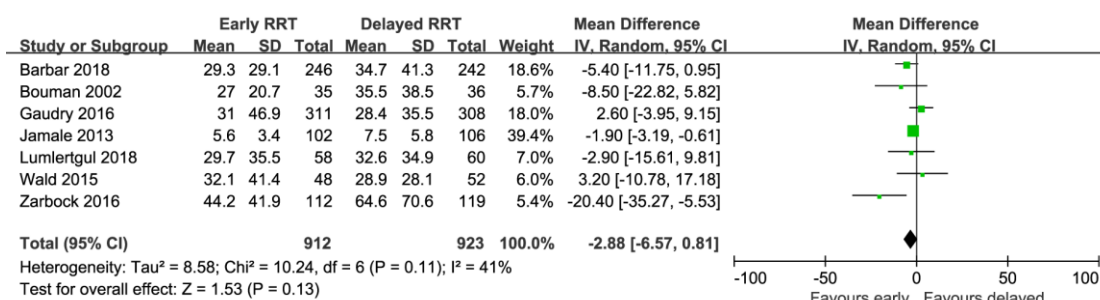

### f. Mechanical ventilation-free days at 28 days

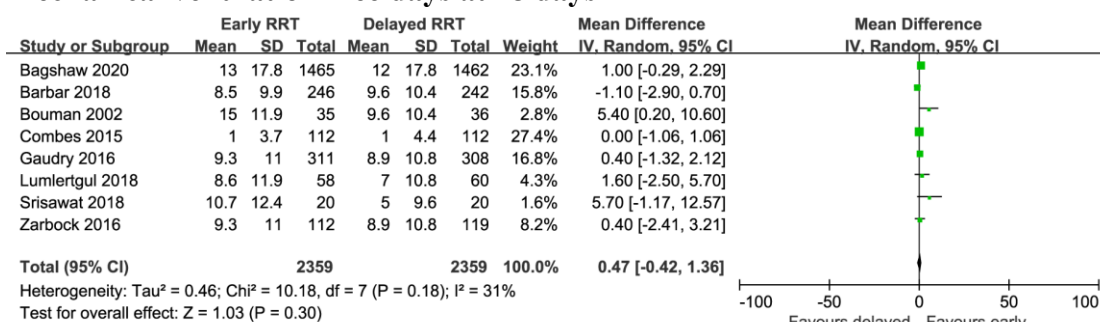

### g. RRT-free days at 28 days

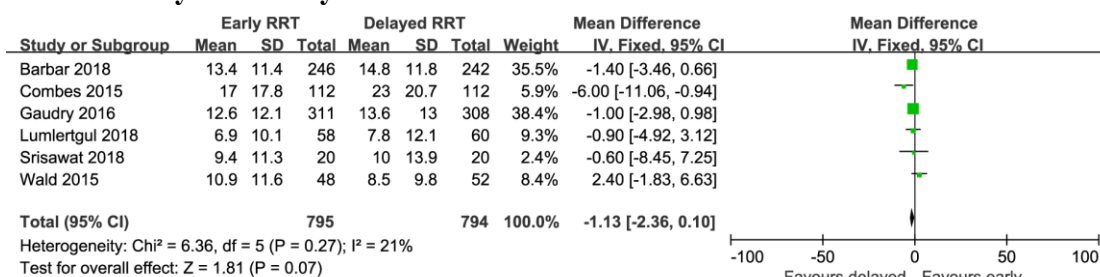

### h. Vasopressor-free days at 28 days

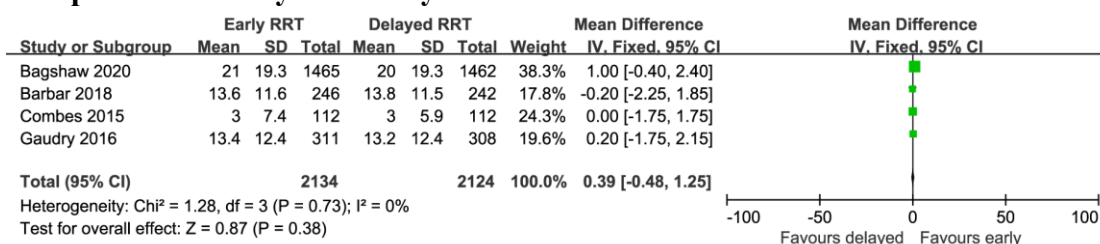

Supplement: 13054_2020_3451_MOESM5_ESM.pdf [file 13054_2020_3451_MOESM5_ESM.pdf]
