# Supplementary material for: Timing of renal replacement therapy initiation for acute kidney injury in critically ill patients: a systematic review of randomized clinical trials with meta-analysis and trial sequential analysis
Source: PubMed Central journal article supplement (PMC7789484; doi:10.1186/s13054-020-03451-y), 2021-01-06

### a. Subgroup analyses for 28-day mortality divided by the mean age of participants in each study

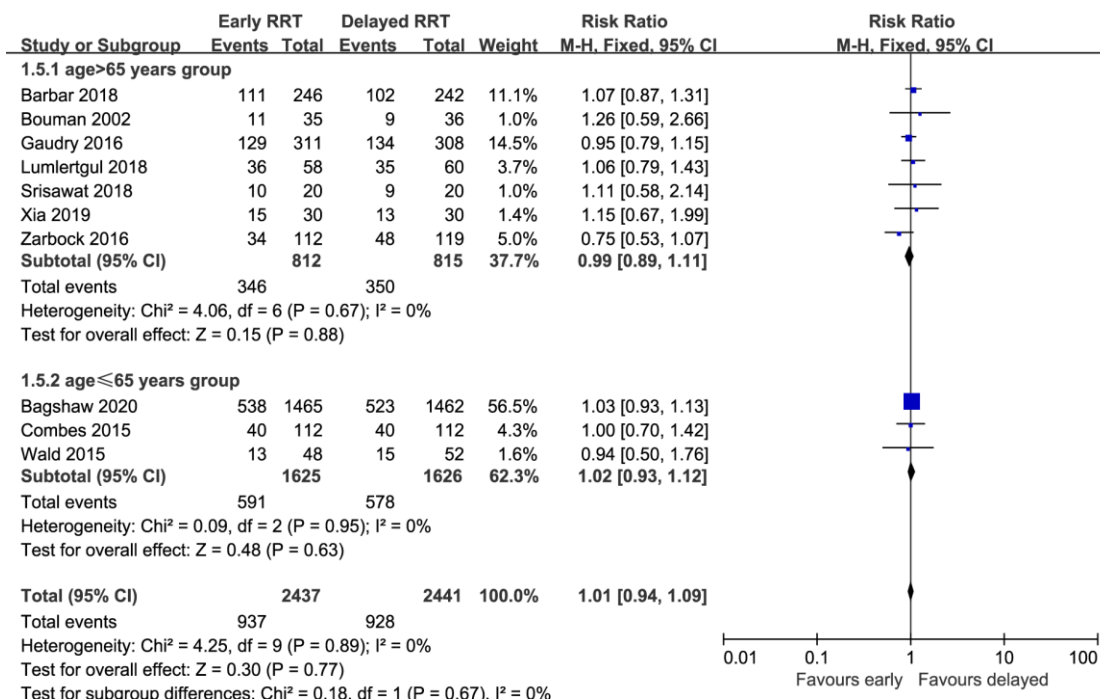

### b. Subgroup analyses for 28-day mortality divided by the SOFA scores at administration

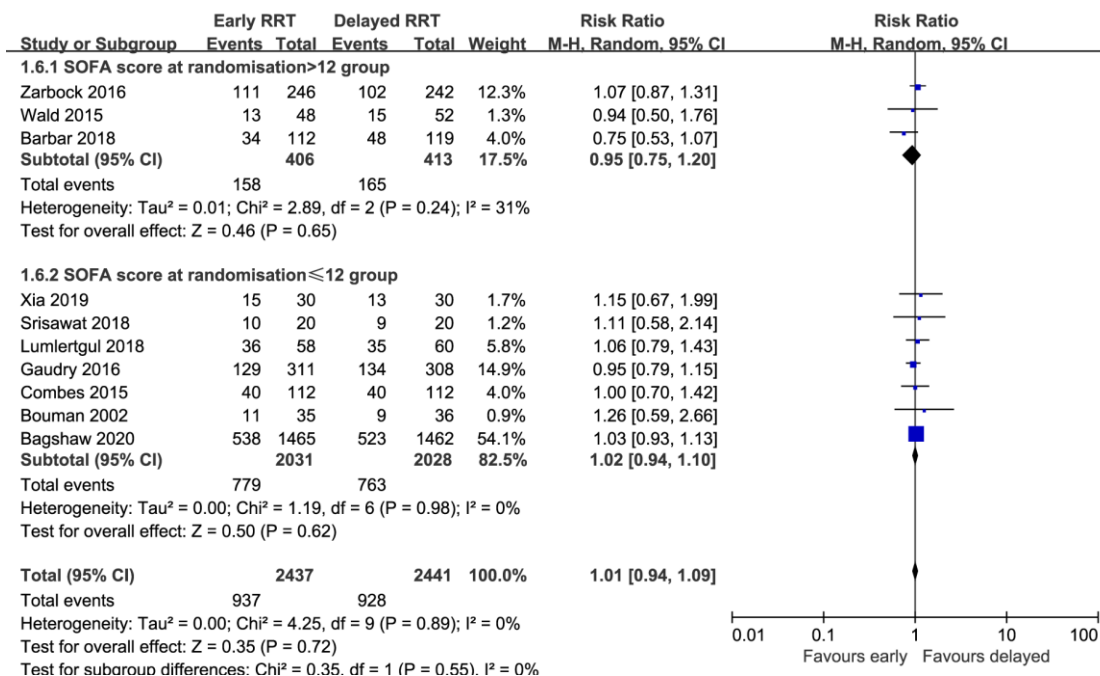

### c. Subgroup analyses for 28-day mortality divided by the criteria for early RRT initiation

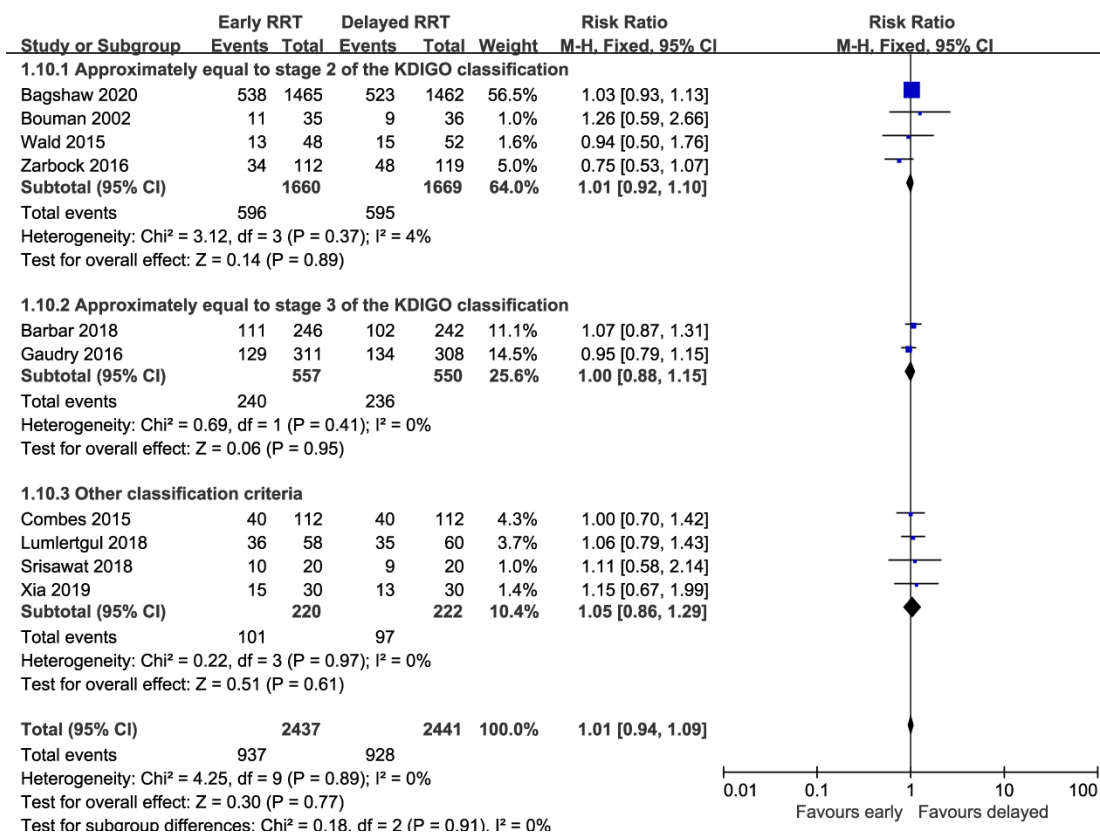

### d. Sensitivity analyses according to publish language (excluding the study published in Chinese)

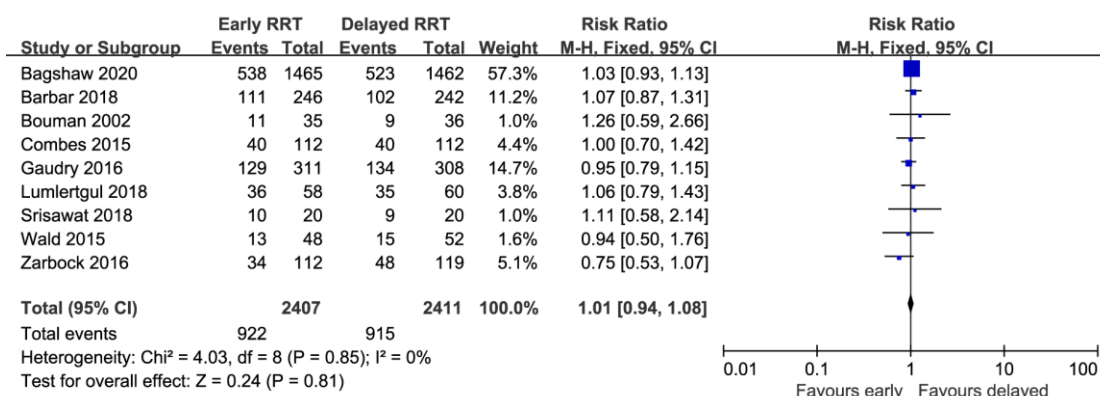

**e. Sensitivity analyses according to risk of bias (only including studies classified as low risk of bias)**

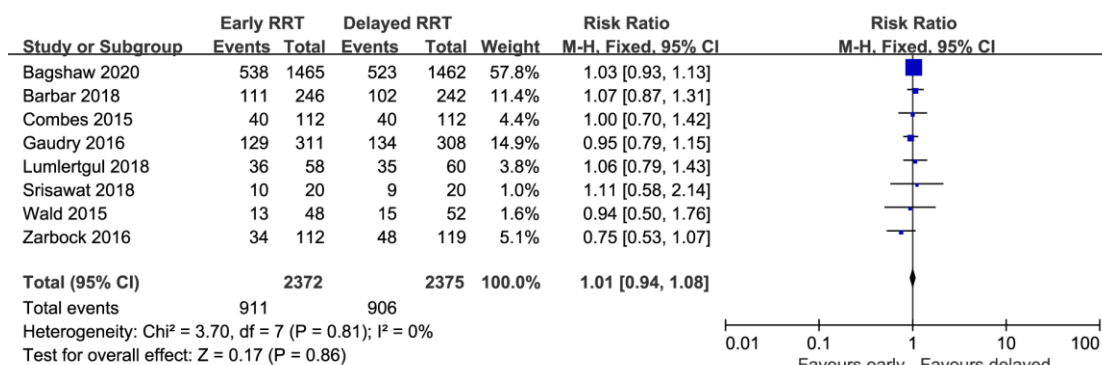

**f. Sensitivity analyses according to publish year (removing studies published before 2010)**

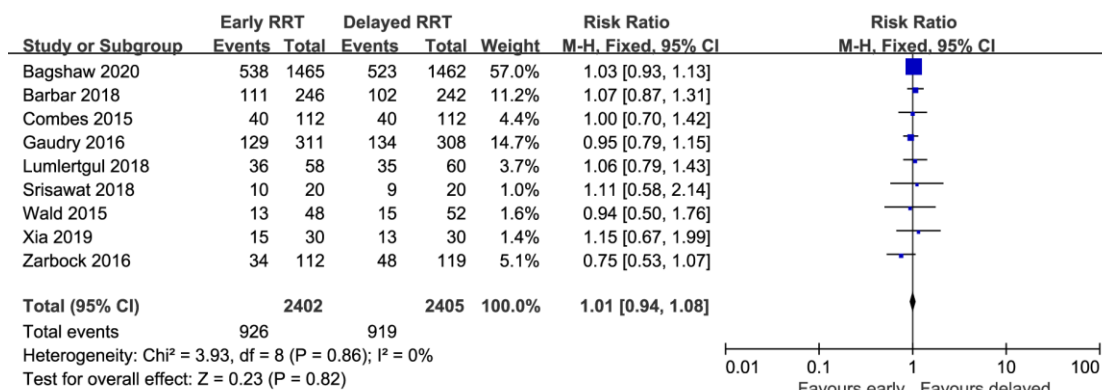

Supplement: 13054_2020_3451_MOESM6_ESM.pdf [file 13054_2020_3451_MOESM6_ESM.pdf]
